# Supplementary material for: Human CD24+ dental papilla cells are highly competent seed cells for dentin-pulp regeneration via BMP2/SIRT1 metabolic axis
Source: Research Square preprint supplement (doi:10.21203/rs.3.rs-7598595/v1), 2025-09-29
Supplement: Supplementary file 1 [file d56d4b55c645eb6af95814e4.pdf]

1 **Supplementary Information**

2 **Human CD24<sup>+</sup> dental papilla cells are highly competent seed cells for**  
3 **dentin-pulp regeneration via BMP2/SIRT1 metabolic axis**

4

5

6 This PDF file includes:

7 Supplementary Figs 1 to 11.

8 Supplementary Table 1. Primer sequences used for quantitative RT-qPCR.

9 Supplementary Table 2. siRNA sequences.

10      **Supplementary Figure 1:**

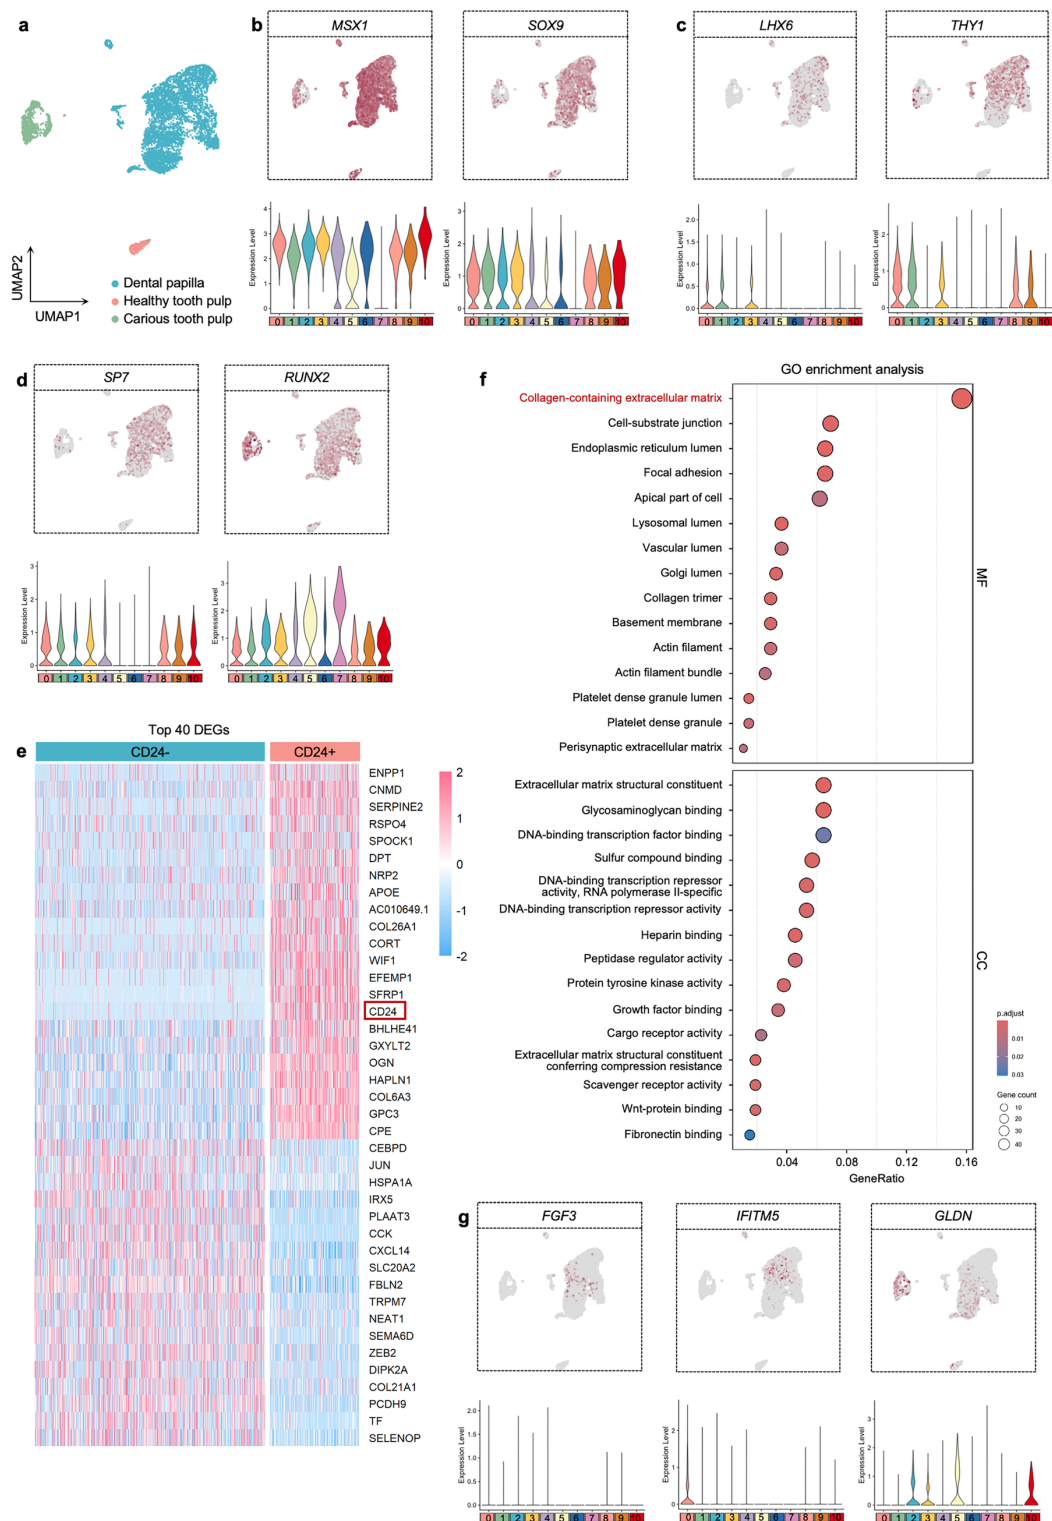

11

12      **Supplementary Figure 1. Characterization of mesenchymal cell subsets by re-**  
13      **clustering analysis. a** Integrated UMAP plot of DMCs across the dental papilla, adult  
14      tooth pulp, and carious tooth pulp in humans. **b–d** Feature (upper) and violin (below)

15 plots of *MSX1*, *SOX9*, *LHX6*, *THY1*, *RUNX2*, and *SP7* expression in each cell cluster. **e**  
16 Heatmap of the top 40 DEGs between CD24<sup>+</sup> and CD24<sup>-</sup> subsets. **f** GO enrichment  
17 analysis of the top 15 enriched Molecular Functions (MF) and Cellular Component (CC)  
18 terms. **g** Feature plot of *FGF3*, *GLDN*, and *IFITM5* expression.

19     **Supplementary Figure 2:**

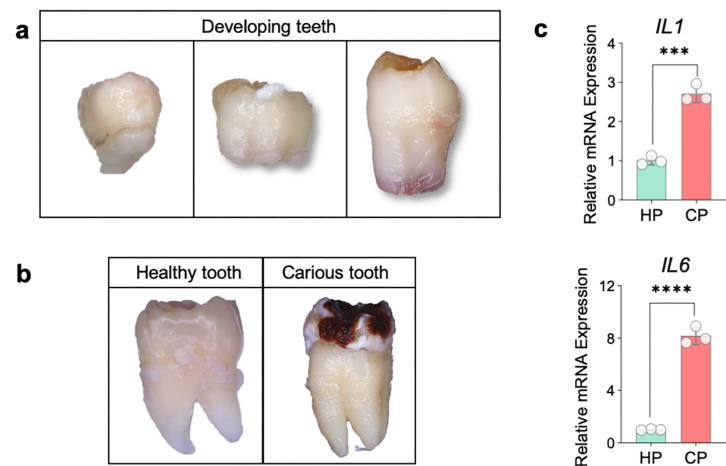

20

21     **Supplementary Figure 2. Dental papilla and pulp samples from developing stage**  
22     **and carious conditions. a, b** Representative tooth sample at different developing  
23     stages and carious state. **c** mRNA expression of *IL1* and *IL6* from pulp samples in **(b)**.  
24      $n = 3$  per group. Data are mean  $\pm$  SEM, \*\*\* $P < 0.001$ , \*\*\*\* $P < 0.0001$ , unpaired  
25     Student's *t*-test.



26 **Supplementary Figure 3:**

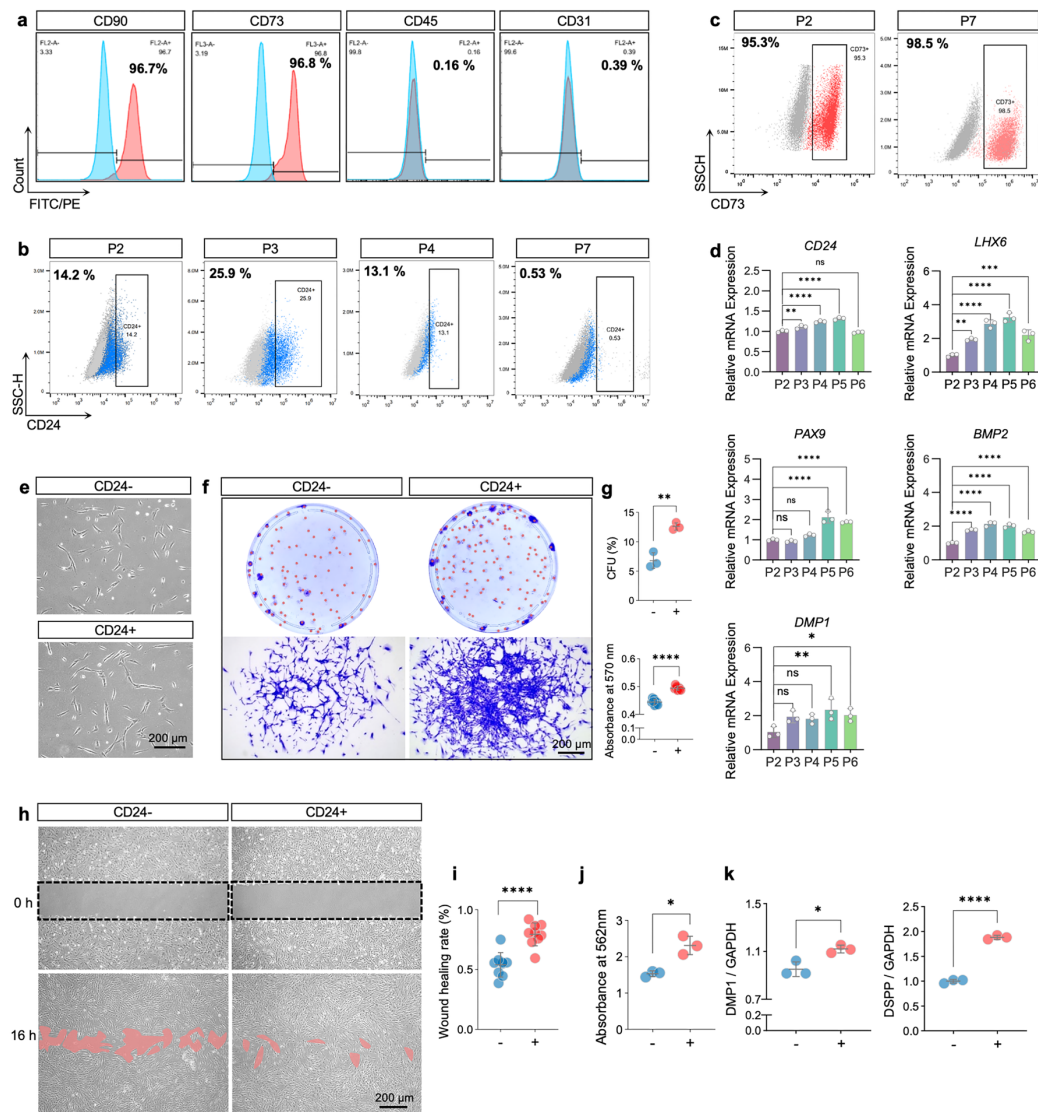

27

28 **Supplementary Figure 3. Functional assessment of CD24<sup>+</sup> hDPCs in 2D culture**

29 **system.** **a** Flow cytometry analysis of CD90<sup>+</sup>, CD73<sup>+</sup>, CD45<sup>+</sup>, and CD31<sup>+</sup> cell  
30 proportions in cultured hDPCs. **b, c** CD24<sup>+</sup> (**b**) and CD73<sup>+</sup> (**c**) cell proportions during  
31 serial passaging (P2–P7) in cultured hDPCs using flow cytometry. **d** mRNA expression  
32 of *CD24*, *LHX6*, *PAX9*, *BMP2*, and *DMP1* in cultured hDPCs during serial passaging  
33 (P2–P6). *n* = 3 per group. **e** Bright-field images showing the morphology of sorted  
34 CD24<sup>+</sup> and CD24<sup>-</sup> hDPCs. **f** Colony-forming assay of CD24<sup>+</sup> and CD24<sup>-</sup> hDPCs at day  
35 10. Crystal violet staining showing the cell clusters. **g** Quantification of the colony-

forming unit (CFU) and absorbance at 570 nm of crystal violet staining in **(f)**.  $n = 3$   
per group. **h** Bright-field images showing the migration of CD24<sup>+</sup> and CD24<sup>-</sup> hDPCs  
by the scratch assay, cultured for 16 hours. The pink pseudo-color shows the unhealed  
area. **i** Quantification of wound healing rate in **(h)**.  $n = 9$  per group. **j** Quantification of  
Alizarin red staining by absorbance at 562 nm in Fig. 2f. **k** Quantification of DMP1 and  
DSPP expression in Fig. 2h. Data are mean  $\pm$  SEM,  $*P < 0.05$ ,  $**P < 0.01$ ,  $***P <$   
 $0.001$ ,  $****P < 0.0001$ , ns, not significant, unpaired Student's  $t$ -test (**g**, **i–k**) or one-way  
ANOVA followed by Tukey's test (**d**).

45 **Supplementary Figure 4:**

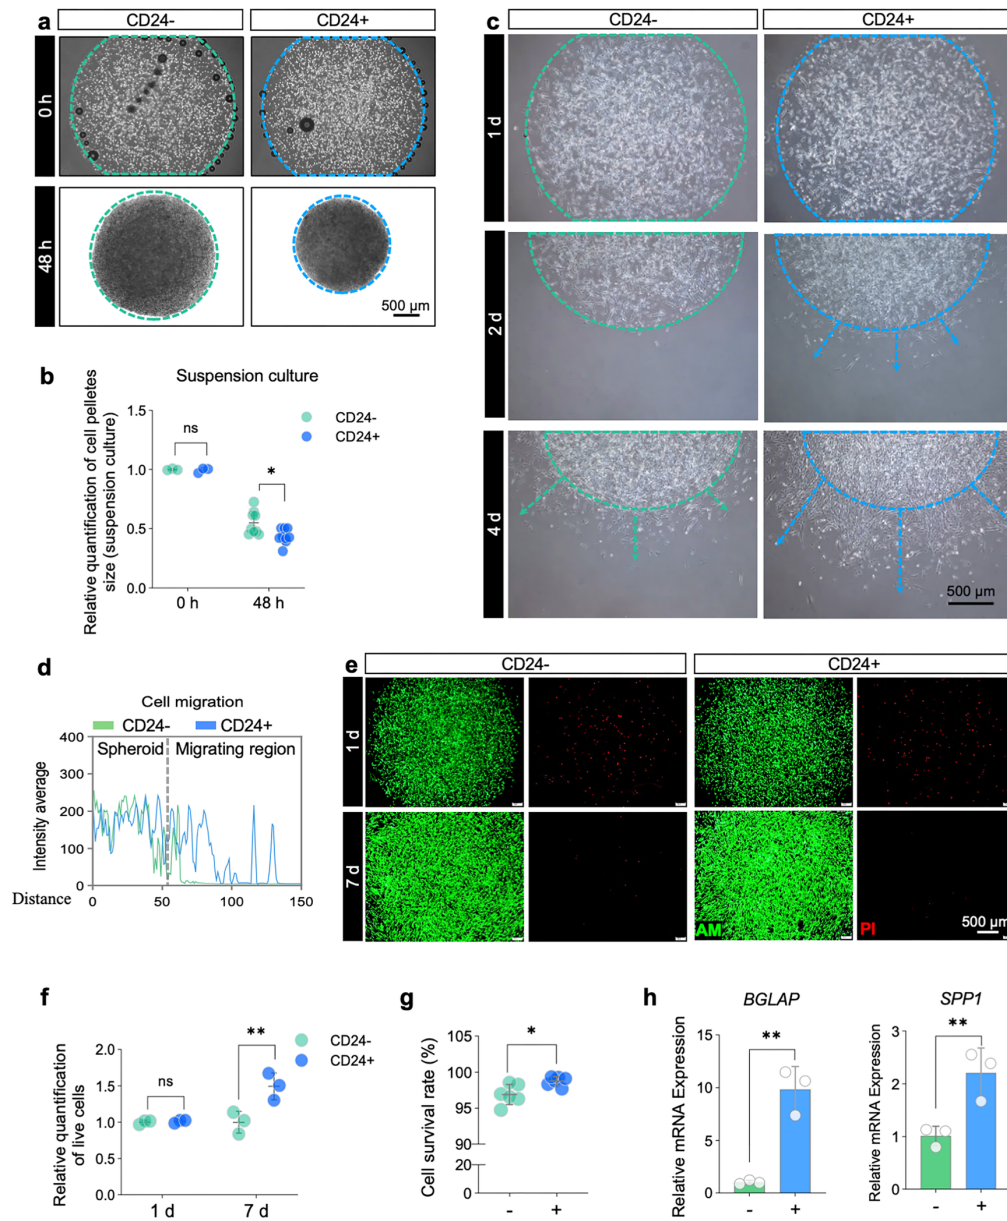

46

47 **Supplementary Figure 4. Functional assessment of CD24<sup>+</sup> hDPCs in 3D culture**

48 **system. a** Bright-field images showing spheroid contraction of CD24<sup>+</sup> and CD24<sup>-</sup>

49 hDPCs under high-density (4 × 10<sup>6</sup> cells/mL) suspension 3D culture conditions. 0 h

50 represents culture initiation (baseline), and subsequent time points illustrate size

51 changes during incubation. Dashed lines delineate the spheroid boundary. **b**

52 Quantification of spheroid diameters in (a). *n* = 9 per group. **c** Bright-field fluorescent

53 staining showing cell migration from low-density ( $2 \times 10^6$  cells/mL) spheroids in  
54 adherent 3D culture. Dashed lines delineate the spheroid boundary and radial migration  
55 direction. **d** Intensity profile of selected regions (white arrow line) in Fig. 2k. **e**  
56 Fluorescence microscopy images of CD24<sup>+</sup> and CD24<sup>-</sup> spheroids cultured under  
57 adherent 3D conditions for 1 day and 7 days. Live cells were stained with calcein AM  
58 (AM; green) and dead cells with propidium iodide (PI; red) to assess viability. **f, g**  
59 Quantification of live cell density (**f**,  $n = 3$  per group) and cell viability (**g**,  $n = 6$  per  
60 group) in (**e**). **h** mRNA expression of mineralization-related genes *BGLAP* and *SPP1*  
61 in Fig. 2m. Data are mean  $\pm$  SEM, ns, not significant,  $*P < 0.05$ ,  $**P < 0.01$ , unpaired  
62 Student's *t*-test.



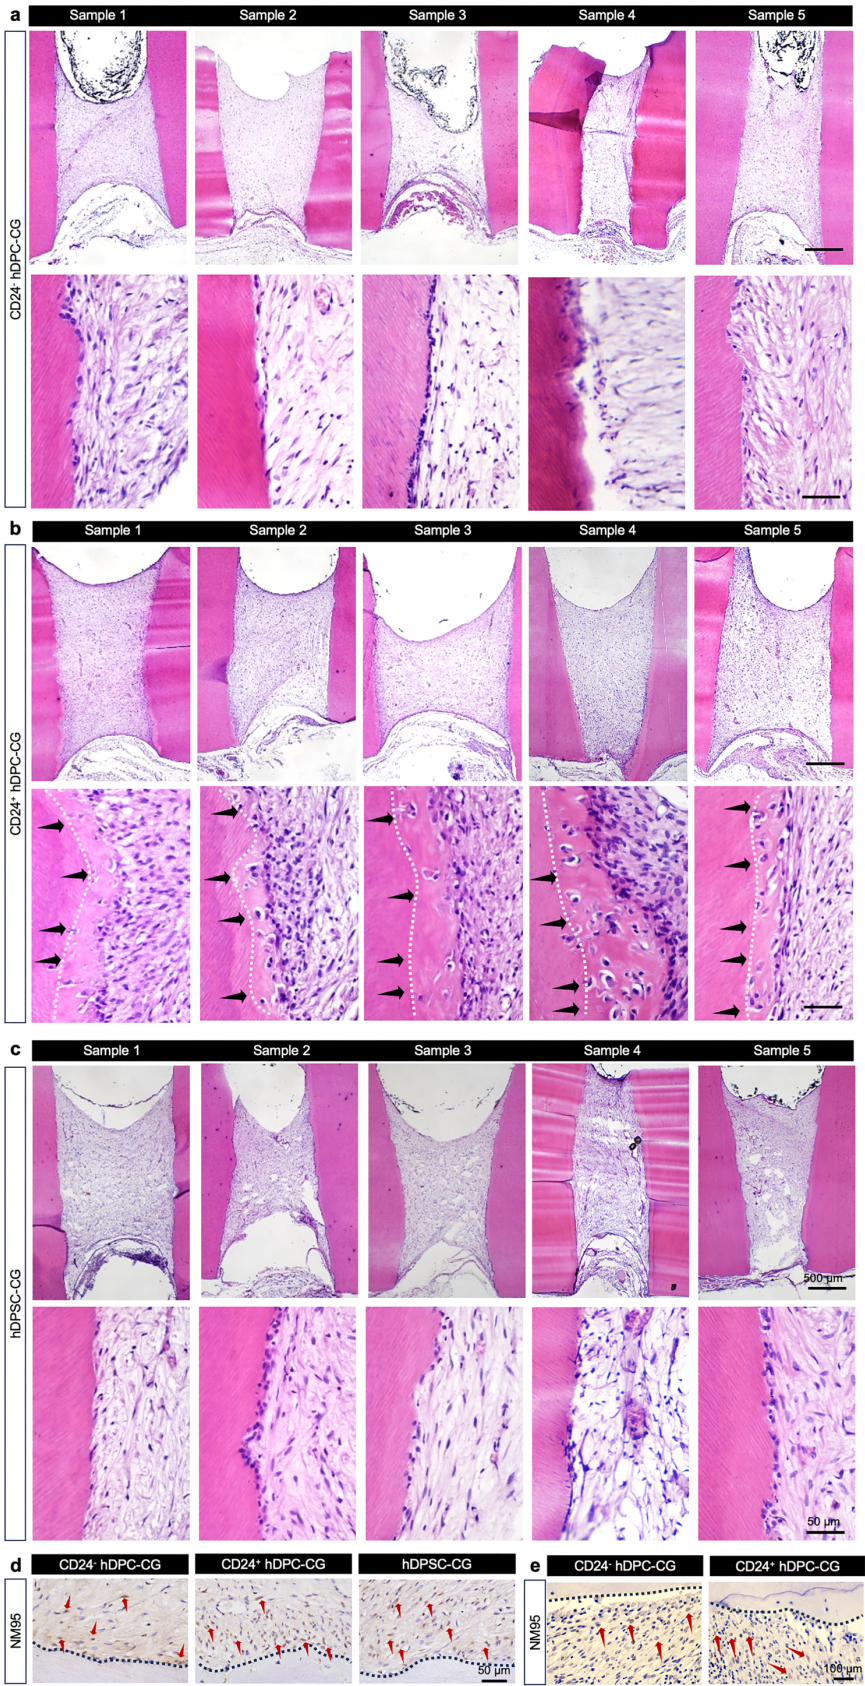

65 **Supplementary Figure 5. CD24<sup>+</sup> hDPC CG mediates dentin-pulp complex**  
66 **regeneration. a–c** H&E staining of regenerated dentin-pulp-like tissues at 4 weeks  
67 post-transplantation. White dashed lines show the tissue boundaries. Black arrows  
68 indicate regenerated dentin wall. *n* = 5 per group. **d, e** Immunohistochemical staining  
69 for human cell marker NM95 in regenerated pulp-like tissues of the murine (**d**) and the  
70 minipig (**e**) models. Black dashed lines show the tissue boundaries. Red arrows indicate  
71 NM95<sup>+</sup> cells.

72 **Supplementary Figure 6:**

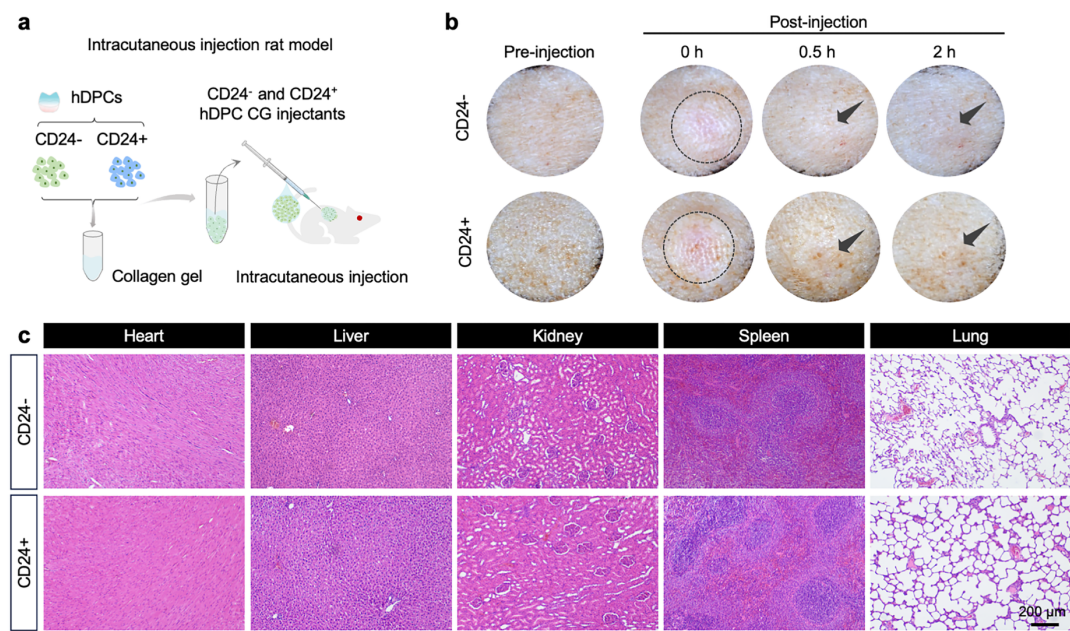

73

74 **Supplementary Figure 6. Biosafety evaluation of CD24<sup>+</sup> and CD24<sup>-</sup> hDPC CG**  
75 **injectant. a** Schematic illustrating the procedures of intracutaneous injection in  
76 immunocompetent rats. **b** Representative images of acute inflammatory responses at  
77 pre-injection, and 0, 0.5, and 2h post-injection. **c** H&E staining of major organs at 1  
78 week post-injection.

79



80 **Supplementary Figure 7:**

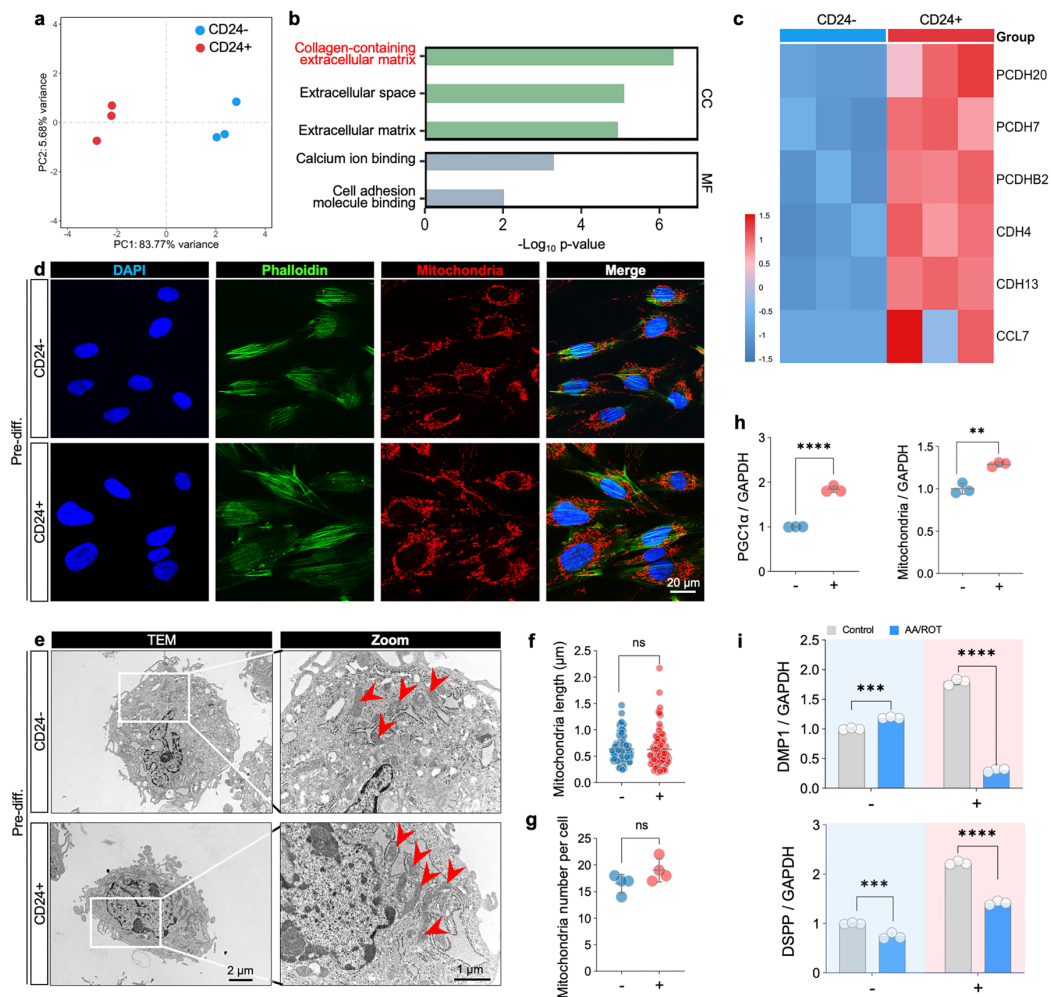

81

82 **Supplementary Figure 7. Mitochondrial metabolic shift during CD24<sup>+</sup> hDPCs**

83 **lineage specification.** **a** PCA showing distinct transcriptomic profiles between cultured

84 CD24<sup>+</sup> and CD24<sup>-</sup> hDPCs. **b** GO analysis showing enriched MF and CC terms. **c**

85 Heatmap of the differential genes of cadherin and chemokine families in CD24<sup>+</sup> and

86 CD24<sup>-</sup> hDPCs. **d** Immunofluorescence imaging of mitochondria distribution in cultured

87 CD24<sup>+</sup> and CD24<sup>-</sup> hDPCs before induction. **e** TEM images showing mitochondrial

88 morphology (indicated by red arrowheads) in CD24<sup>+</sup> and CD24<sup>-</sup> hDPCs before

89 induction. **f, g** Quantification of mitochondrial length ( $n = 90$  per group) and number

90 per cell ( $n = 4$  per group) from TEM images in (e). **h** Quantification of PGC1α

91 expression and mitochondrial protein content in Fig. 4o. **i** Quantification of DMP1 and



92 DSPP expression in Fig. 4q. **j** mRNA expression for *PPARGC1A* and *TFAM* in CD24<sup>+</sup>  
93 hDPCs treated with AA/ROT.  $n = 3$  per group. Data are mean  $\pm$  SEM,  $**P < 0.01$ ,  
94  $***P < 0.001$ ,  $****P < 0.0001$ , ns, not significant, unpaired Student's *t*-test.

95 **Supplementary Figure 8:**

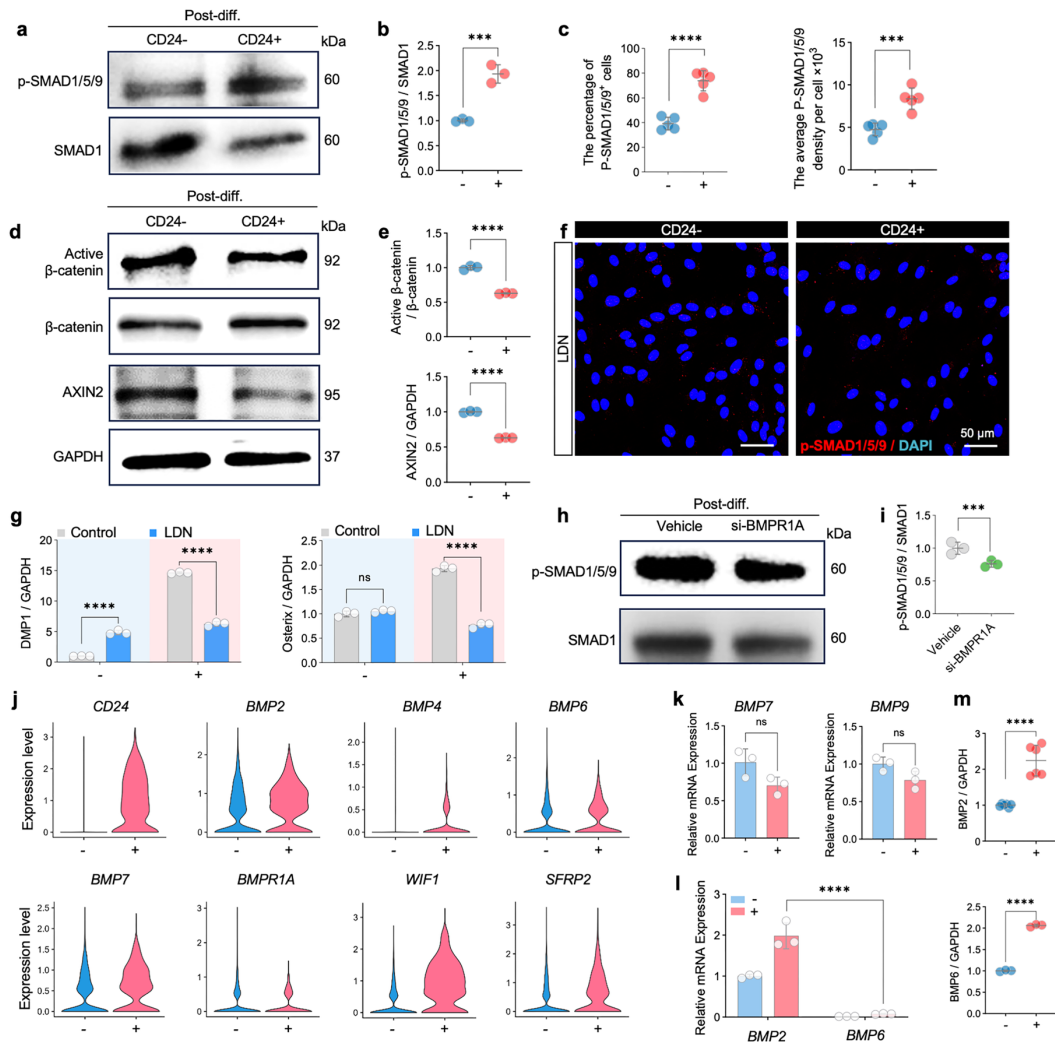

96

97 **Supplementary Figure 8. BMP signaling activation during odontogenic**

98 **differentiation of CD24<sup>+</sup> hDPCs.** **a** Immunoblotting for p-SMAD1/5/9 expression in

99 CD24<sup>+</sup> and CD24<sup>-</sup> hDPCs under induction. *n* = 3 per group. **b** Quantification of p-

100 SMAD1/5/9 expression in (a). **c** Quantification of p-SMAD1/5/9<sup>+</sup> cell proportion and

101 signal intensity per cell in Fig. 5a. *n* = 5 per group. **d** Immunoblotting for active  $\beta$ -

102 catenin,  $\beta$ -catenin, and AXIN2 expression in induced CD24<sup>+</sup> and CD24<sup>-</sup> hDPCs. *n* = 3

103 per group. **e** Quantification of indicated protein levels in (d). **f** Immunofluorescent

104 staining for p-SMAD1/5/9 in CD24<sup>+</sup> and CD24<sup>-</sup> hDPCs induced with LDN193189. **g**

105 Quantification of DMP1 and OSX expression in Fig. 5g. **h** Immunoblotting for p-

106 SMAD1/5/9 expression with or without siRNA-mediated knockdown of *BMPRI1A* in  
107 CD24<sup>+</sup> hDPCs. *n* = 3 per group. **i** Quantification of p-SMAD1/5/9 protein level in **(h)**.  
108 **j** Violin plots of *CD24*, *BMP2*, *BMP4*, *BMP6*, *BMP7*, *BMPRI1A*, *WIF1*, and *SFRP2*  
109 expression in CD24<sup>+</sup> and CD24<sup>-</sup> subsets. **k** mRNA expression of *BMP7* and *BMP9* in  
110 cultured CD24<sup>+</sup> and CD24<sup>-</sup> hDPCs. *n* = 3 per group. **l** mRNA expression of *BMP2* and  
111 *BMP6*. *n* = 3 per group. **m** Quantification of BMP2 and BMP6 protein levels in Fig.  
112 5s. Data are mean ± SEM, \*\*\**P* < 0.001, \*\*\*\**P* < 0.0001, ns, not significant, unpaired  
113 Student's *t*-test.

## Supplementary Figure 9:

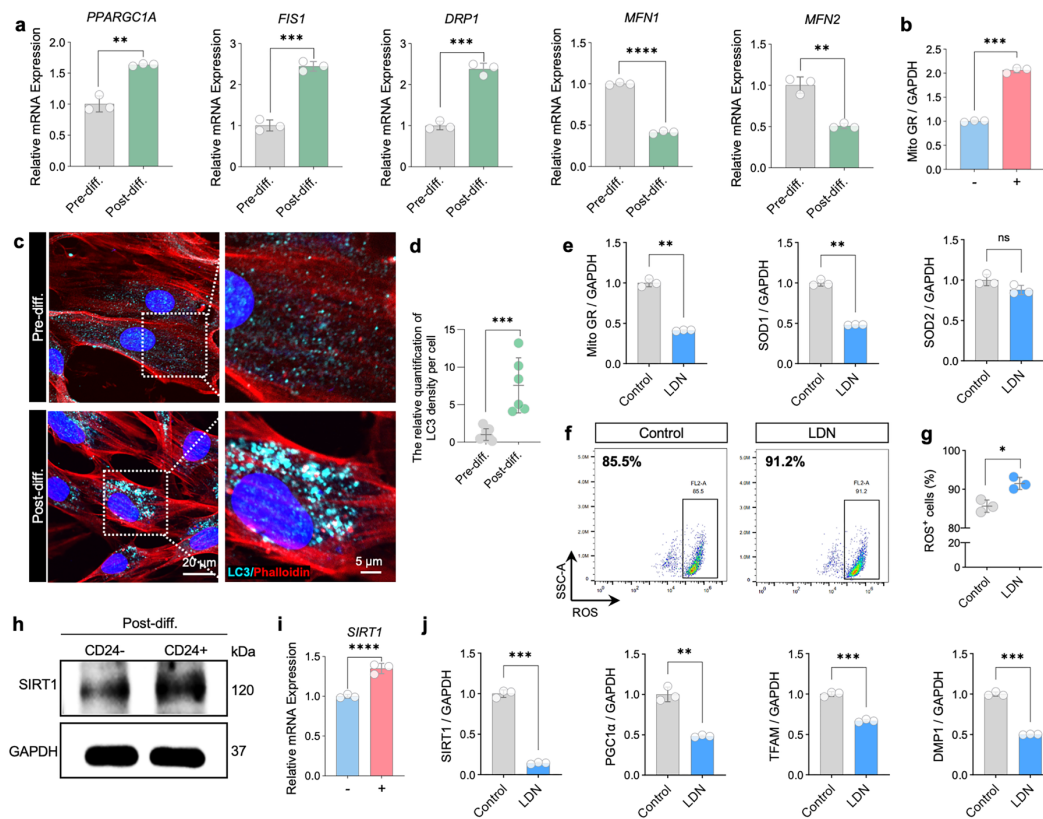

**Supplementary Figure 9. BMP/SIRT1-mediated regulatory network in odontogenic differentiation of CD24<sup>+</sup> hDPCs.** **a** mRNA expression of *PPARGC1A*, *FIS1*, *DRP1*, *MFN1*, and *MFN2* in induced CD24<sup>+</sup> hDPCs. *n* = 3 per group. **b** Quantification of mito GR expression level in Fig. 6f. **c** Immunofluorescent staining for LC3 in CD24<sup>+</sup> hDPCs before and after induction. **d** Quantification of LC3 fluorescence intensity in (c). *n* = 6 per group. **e** Quantification of Mito GR, SOD1, and SOD2 expression levels in Fig. 6i. **f** Flow cytometry showing ROS level in CD24<sup>+</sup> hDPCs induced with or without LDN193189. *n* = 3 per group. **g** Quantification of ROS<sup>+</sup> cell proportion in (f). **h** Immunoblotting for SIRT1 expression in induced CD24<sup>+</sup> and CD24<sup>-</sup> hDPCs. *n* = 3 per group. **i** Quantification of SIRT1 expression level in (h). **j** Quantification of SIRT1, PGC1 $\alpha$ , TFAM, and DMP1 expression in Fig. 6q. Data are mean  $\pm$  SEM, \**P* < 0.05, \*\**P* < 0.01, \*\*\**P* < 0.001, \*\*\*\**P* < 0.0001, ns, not significant, unpaired Student's *t*-test.

Supplementary Figure 10:

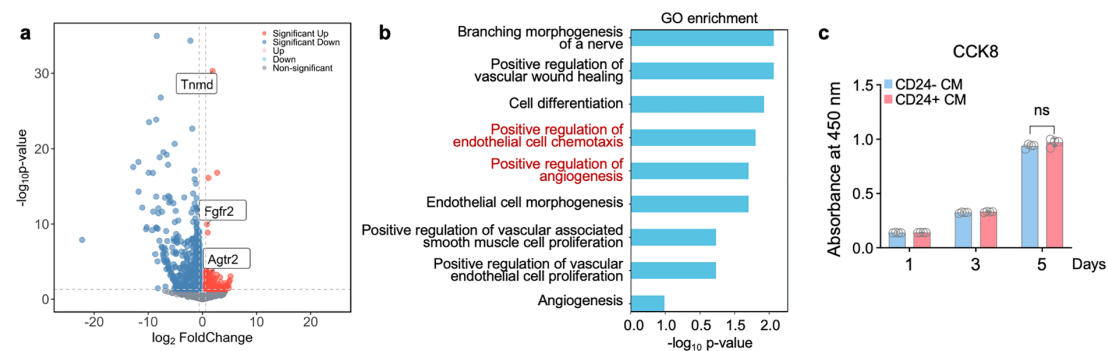

**Supplementary Figure 10. The pro-angiogenic capacity of CD24<sup>+</sup> hDPCs. a**

**b** Volcano plot showing DEGs of transcriptomic analysis in regenerated tissues between

CD24<sup>+</sup> and CD24<sup>-</sup> groups within the ectopic model, at two weeks post-transplantation.

**c** GO analysis visualizing the enriched angiogenesis-related terms in the CD24<sup>+</sup> group.

**d** CCK8 assay evaluating proliferation capability of HUVEC under CD24<sup>+</sup> or CD24<sup>-</sup>

hDPC-derived CM treatment. *n* = 4 per group. Data are mean ± SEM, ns, not significant,

unpaired Student's *t*-test.

**Supplementary Figure 11:**

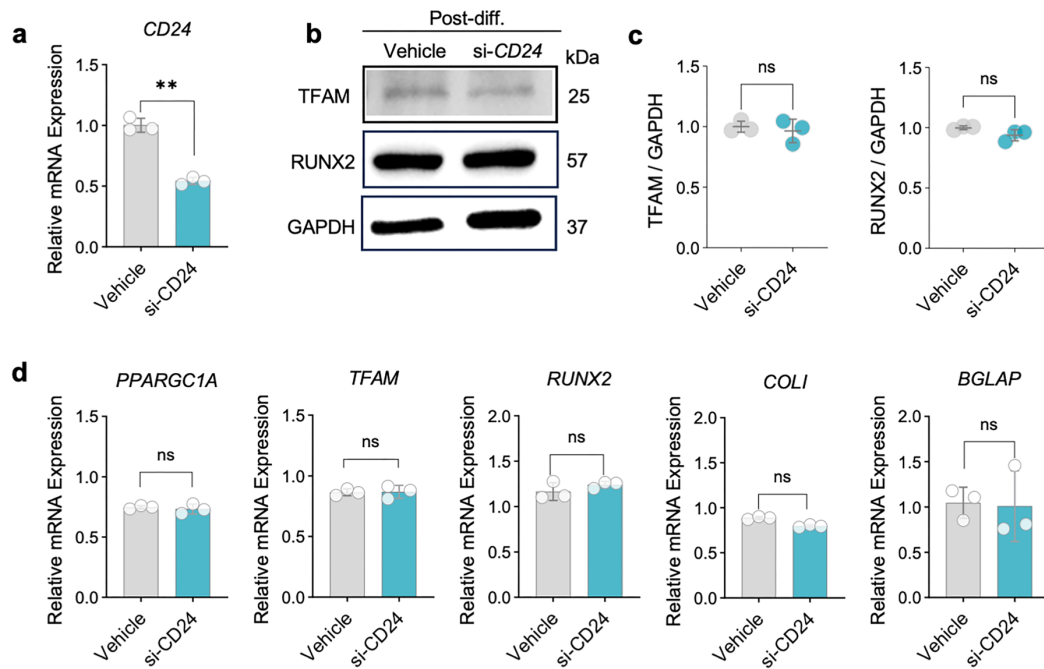

**Supplementary Figure 11. Regulatory role of the *CD24* gene in *CD24*<sup>+</sup> hDPCs.** **a** mRNA expression of *CD24* in *CD24*<sup>+</sup> hDPCs treated with or without *CD24* siRNA. *n* = 3 per group. **b** Immunoblotting for *TFAM* and *RUNX2* expression in induced *CD24*<sup>+</sup> hDPCs treated with *CD24* siRNA. *n* = 3 per group. **c** Quantification of indicated protein levels in **(b)**. **d** mRNA expression of *PPARGC1A*, *TFAM*, *RUNX2*, *COLI*, and *BGLAP* in *CD24*<sup>+</sup> hDPCs treated with *CD24* siRNA. *n* = 3 per group. Data are mean ± SEM, \*\**P* < 0.01, ns, not significant, unpaired Student's *t*-test.

**Supplementary Table 1: Primer sequences used for quantitative RT-PCR.**

| Gene                           | Forward                    | Reverse                   |
|--------------------------------|----------------------------|---------------------------|
| <i>CD24</i>                    | CTCCATTCCACAATCCCATC       | GAAGGAGAGGCAACATCCAA      |
| <i>LHX6</i>                    | GCTCTGCCGCATCCACTACG       | TTGGGTTGACTGTCCTGTTCCG    |
| <i>PAX9</i>                    | GCTCCATCACCGACCAAGT        | CTCCCTTCTCCAACCCGTTC      |
| <i>RUNX2</i>                   | CTTTACTTACACCCCGCCAGTC     | AGAGATATGGAGTGCTGCTGGTC   |
| <i>ALP</i>                     | TAAGGACATCGCCTACCAGCTC     | TCTTCCAGGTGTCAACGAGGT     |
| <i>DSPP</i>                    | CGACATAGGTCACAATGAGGATGTCG | TTGCTTCCAGCTACTTGAGGTC    |
| <i>DMP1</i>                    | AGCATCCTGCTCATGTTTCCTT     | TGATGACTCACTGCTCTCCAAG    |
| <i>OCN</i>                     | CTCACACTCCTCGCCCTATT       | CCTCCTGCTTGGACACAAA       |
| <i>OPN</i>                     | CAGTTGTCCCCACAGTAGACAC     | GTGATGTCTCGTCTGTAGCATC    |
| <i>COL1</i>                    | AACATGGAGACTGGTGAGACCT     | CGCCATACTCGAACTGGAATC     |
| <i>IL1</i>                     | CTTTGAAGCTGATGGCCCTAAA     | AGTGGTGGTCGGAGATTCGT      |
| <i>IL6</i>                     | TGTGAAAGCAGCAAAGAGGC       | TGGGTCAGGGGTGGTTATT       |
| <i>BMP2</i>                    | AACAATGGCATGATTAGTGG       | CAGACGGGAGTTTCTCCTCGGACGT |
| <i>BMP6</i>                    | GCTCAACCGCAAGAGCCTTC       | TGTCGTACTCCACCAGGTTC      |
| <i>BMP7</i>                    | GACTTCAGCCTGGACAACGA       | AGGTCCAGCATGAACATGGG      |
| <i>BMP9</i>                    | AGGTGAGAGCAGTCACGAG        | CGTCACATCGTCAGCCAAG       |
| <i>BMPRI1A</i>                 | CCTGTTGTATAGGTCCGTTTT      | ATCCTGTTCCAAATCACGATTGT   |
| <i>SFRP2</i>                   | ATGATGATGACAACGACATAATG    | ATGCGCTTGAACCTCTCTCTGC    |
| <i>WIF1</i>                    | TCTCCAAACACCTCAAATGCT      | GACACTCGCAGATGCGTCT       |
| <i>SIRT1</i>                   | AGAACTTCAGTGGCTGGAACAGTG   | CCATCAAGCCGCCTACTAATCTGC  |
| <i>PGC1<math>\alpha</math></i> | TCTGAGTCTGTATGGAGTGACAT    | CCAAGTCGTTACATCTAGTTCA    |
| <i>TFAM</i>                    | ATGGCGTTTCTCCGAAGCAT       | TCCGCCCTATAAGCATCTTGA     |
| <i>NRF1</i>                    | AGGAACACGGAGTGACCCAA       | TATGCTCGGTGTAAGTAGCCA     |
| <i>FIS1</i>                    | GATGACATCCGTAAAGGCATCG     | AGAAGACGTAATCCCGCTGTT     |
| <i>DRP1</i>                    | CTGCCTCAAATCGTCGTAGTG      | GAGGTCTCCGGGTGACAATTC     |
| <i>MFN1</i>                    | TGGCTAAGAAGGCGATTACTGC     | TCTCCGAGATAGCACCTCACC     |
| <i>MFN2</i>                    | CTCTCGATGCAACTCTATCGTC     | TCCTGTACGTGTCTTCAAGGAA    |
| <i>SOD1</i>                    | TCATCAATTTGAGCAGAAGG       | CAGGCCTTCAGTCAGTCCTTT     |
| <i>SOD2</i>                    | GGAAGCCATCAAACGTGACTT      | CCCGTTCCTTATTGAAACCAAGC   |
| <i>VEGF</i>                    | AGGGAAGAGGAGGAGATGAG       | GCTGGGTTTGTCTGGTGT        |

150 **Supplementary Table 2: siRNA sequences.**

| Gene                      | Sequences                   |
|---------------------------|-----------------------------|
| si <i>CD24</i> (human)    | 5'-GCAGTCAACAGCCAGTCTCTT-3' |
| si <i>BMPRI1A</i> (human) | 5'-GCTGTCTGCATAATTGCTATG-3' |
| si <i>Cd24</i> (mouse)    | 5'-GAUUAAAGGACGCGUGAAATT-3' |

151
